## Nitrous Oxide Produces Antinociceptive Response via $\alpha_{2B}$ and/or $\alpha_{2C}$ Adrenoceptor Subtypes in Mice

Tian-Zhi Guo, M.D.,\* M. Frances Davies, Ph.D.,\* Wade S. Kingery, M.D.,† Andrew J. Patterson, M.D.,‡  
Lee E. Limbird, Ph.D.,§ Mervyn Maze, M.B., Ch.B., F.R.C.P.#

**Background:** Opiate receptors in the periaqueductal gray region and  $\alpha_2$  adrenoceptors in the spinal cord of the rat mediate the antinociceptive properties of nitrous oxide ( $N_2O$ ). The availability of genetically altered mice facilitates the detection of the precise protein species involved in the transduction pathway. In this study, the authors establish the similarity between rats and mice in the antinociceptive action of  $N_2O$  and investigate which  $\alpha_2$  adrenoceptor subtypes mediate this response.

**Methods:** After obtaining institutional approval, antinociceptive dose-response and time-course to  $N_2O$  was measured in wild-type and transgenic mice (D79N), with a nonfunctional  $\alpha_{2A}$  adrenoceptor using tail-flick latency. The antinociceptive effect of  $N_2O$  was tested after pretreatment systemically with yohimbine (nonselective  $\alpha_2$  antagonist), naloxone (opiate antagonist), L659,066 (peripheral  $\alpha_2$ -antagonist) and prazosin ( $\alpha_{2B}$ - and  $\alpha_{2C}$ -selective antagonist). The tail-flick latency to dexmedetomidine (D-med), a nonselective  $\alpha_2$  agonist, was tested in wild-type and transgenic mice.

**Results:**  $N_2O$  produced antinociception in both D79N transgenic and wild-type litter mates, although the response was less pronounced in the transgenic mice. Antinociception from  $N_2O$  decreased over time with continuing exposure, and the decrement was more pronounced in the transgenic mice. The antinociceptive response could be dose dependently antagonized by opiate receptor and selective  $\alpha_{2B}$ -/ $\alpha_{2C}$ -receptor antagonists but not by a central nervous system-impermeant  $\alpha_2$  antagonist

(L659,066). Whereas dexmedetomidine exhibited no antinociceptive response in the D79N mice, the robust antinociceptive response in the wild-type litter mates could not be blocked by a selective  $\alpha_{2B}$ -/ $\alpha_{2C}$ -receptor antagonist.

**Conclusion:** These data confirm that the antinociceptive response to an exogenous  $\alpha_2$ -agonist is mediated by an  $\alpha_{2A}$  adrenoceptor and that there appears to be a role for the  $\alpha_{2B}$ - or  $\alpha_{2C}$ -adrenoceptor subtypes, or both, in the analgesic response to  $N_2O$ . (Key words: Analgesia; opiate receptors; tail flick.)

ALMOST 200 years ago, Sir Humphrey Davy<sup>1</sup> first demonstrated the analgesic properties of nitrous oxide ( $N_2O$ ); however, the mechanism for this action still has not been defined. Inhalation of 20–25%  $N_2O$  in oxygen can produce an analgesic effect equivalent to that produced by 15 mg morphine sulfate in humans<sup>2</sup> and similar to morphine,  $N_2O$  analgesia is in part reversed by opiate-receptor antagonists in humans and animals.<sup>3–7</sup> Furthermore, there is unilateral cross-tolerance between morphine and  $N_2O$ .<sup>4,8</sup>

Based on these observations, a mechanism of action for  $N_2O$  has been proposed in which opiate receptors are activated through the release of endogenous ligands. Neurochemical studies have supported such a mechanism.<sup>9–12</sup> The periaqueductal gray has long been known to be an important site for the analgesic action of opiates (Cf)<sup>13</sup>; therefore, we<sup>14</sup> and others<sup>15</sup> demonstrated that the analgesic properties of  $N_2O$  could be blocked by the discrete introduction of opiate antagonists directly into the periaqueductal gray. Furthermore, because Camarata *et al.*<sup>16</sup> demonstrated that opiate-induced analgesia at the periaqueductal gray could be blocked by intrathecal administration of  $\alpha_2$  antagonists; we followed this up by demonstrating that the antinociceptive effects of  $N_2O$  too could be prevented by blockade of  $\alpha_2$  adrenoceptors in the spinal cord.

Molecular genetic cloning studies in humans, rats, and mice have shown that, in each of these species three genes on separate chromosomes encode distinct  $\alpha_2$ -adrenorenergic receptor subtypes. Pharmacologic studies have defined four subtypes named  $\alpha_{2A}$ ,  $\alpha_{2B}$ ,  $\alpha_{2C}$ , and  $\alpha_{2D}$ ,

\* Research Associate, Department of Anesthesia, Stanford University.

† Clinical Assistant Professor, Department of Functional Restoration, Stanford University; and Department of Anesthesiology and Physical Medicine and Rehabilitation Services, Veterans Affairs, Palo Alto Health Care System, Palo Alto, California.

‡ Clinical Assistant Professor, Department of Anesthesia, Stanford University.

§ Professor and Chair, Department of Pharmacology, Vanderbilt University, Nashville, Tennessee.

# Professor, Department of Anesthesia, Stanford University.

Received from the Departments of Anesthesia and Functional Restoration, Stanford University, Stanford, California. Submitted for publication March 26, 1998. Accepted for publication September 17, 1998. Supported by the Department of Veterans Affairs grant NIGMS 30232, Palo Alto Health Care System, Palo Alto, California. Presented at the Association of University Anesthesiologists Meeting, San Francisco, California, May 7, 1998.

Address reprint requests to Dr. Maze: VAPAHCS, Anesthesiology Service (112A), 3801 Miranda Avenue, Palo Alto, California 94304.



with the  $\alpha_{2D}$  representing a rodent species homologue of human  $\alpha_{2A}$  (for review see reference <sup>17</sup>). Radiolabeled ligand and *in situ* hybridization studies with mRNA probes reveal that the receptor subtypes are nonhomogeneously distributed in the central nervous system.<sup>18-26</sup> In the central nervous system, the  $\alpha_{2A}$  subtype is the most prevalent and ubiquitous of the three, whereas  $\alpha_{2B}$  is only present in a few discrete sites, principally the thalamic nuclei, and then in very small amounts. Because of the absence of selective pharmacologic probes, we<sup>27</sup> and others<sup>28,29</sup> resorted to genetically altered animals to ascribe the various properties of  $\alpha_2$  agonists to the different receptor subtypes. Using transgenic mice (D79N; provided by Dr. Lee Limbird) in which a single amino acid residue at position 79 has been mutated from aspartic acid (D) to asparagine (N) to render the  $\alpha_{2A}$ -receptor subtype dysfunctional,<sup>30</sup> we reported that the antinociceptive properties of a nonselective  $\alpha_2$  agonist were mediated by the  $\alpha_{2A}$ -adrenoceptor subtype<sup>27</sup>. We now investigate whether the  $\alpha_{2A}$ -adrenoceptor subtype is exclusively responsible for the antinociceptive properties of N<sub>2</sub>O.

## Methods

The experimental protocol was approved by the Animal Care and Use Committee at the Veterans Administration Palo Alto Health Care System. Male 129/svj wild-type mice (Jackson Labs, Bar Harbor, ME) and D79N transgenic mice (bred at Vanderbilt University, Nashville, TN) weighing 20–30 g (8–10 weeks old) at the time of testing were used. A total of 152 mice were used. Each mouse may have been tested on more than one occasion with a period of 1 week allowed to elapse between successive testings. (In preliminary studies we established that responsiveness does not differ week to week.)

**Antinociceptive Testing.** The antinociceptive response was assessed using an analgesimeter for measurement of the tail-flick latency (TFL) response. A high-intensity light was focused on the middle third of the mouse's tail, and the time for the mouse to move its tail out of the light beam was automatically recorded (Tail-Flick Apparatus; Columbus Instruments, Columbus, OH) and referred to as TFL. A different patch of the tail was exposed to the light beam on each trial to minimize the risk of tissue damage. The animals were placed on the heating blanket to maintain body and tail temperature during the experiment. A cut-off time of 10 s was pre-

determined, at which time the trial was discontinued if no response occurred. Each TFL data point consisted of an average of two trials on an individual animal. From the TFL the percent maximal possible antinociceptive effect (%MPE) was calculated as follows:

$$= (\text{postdrug latency}) - (\text{basal latency}) / (\text{cut-off latency}) - (\text{basal latency}) \times 100\%.$$

Our decision to use this "spinal reflex" to investigate the antinociceptive response to N<sub>2</sub>O is predicated by its widespread application and validation to define the pharmacology of spinally mediated nociception. Alterations in these reflexes may also reflect changes in the activity of supraspinally located neurons that regulate the afferent transmission of nociceptive information by means of direct or indirect projections to the dorsal horn of the spinal cord (for review see reference <sup>31</sup>).

**Gas Exposures.** All gas exposures were performed in an acrylic chamber (81 × 43 × 34 cm) with a sliding door on one side (for insertion of the mice). This airtight chamber was large enough to contain the analgesimeter device. Fresh test gases (10 l/min) were introduced into the chamber *via* an inflow port, circulated throughout the chamber by a small fan, and purged by vacuum set to aspirate at the same rate as the fresh gas inflow. Oxygen concentration in the chamber was maintained between 22 and 45%, whereas N<sub>2</sub>O concentration was varied between 0, 25, 50, and 75% by adjusting the flow rates of N<sub>2</sub>O, air, and nitrogen (AirLiquide, Houston, TX). Gas concentrations were measured continuously and flow rates were adjusted appropriately to maintain the desired concentrations.

## Experimental Schedule

To determine the dependence of N<sub>2</sub>O-induced antinociception on  $\alpha_2$  adrenoceptors, cohorts of mice (n = 8) were pretreated with yohimbine (Sigma Chemical, St Louis, MO), 1 and 2 mg/kg intraperitoneally 30 min before 70% N<sub>2</sub>O exposure, or cohorts of mice (n = 6) were treated with atipamezole (Orion-Farmos, Turku Finland), 1 mg/kg 15 min before dexmedetomidine (Orion-Farmos) 100  $\mu$ g/kg intraperitoneally.

To determine the dependence on peripheral  $\alpha_2$  adrenoceptors, cohorts of mice (n = 8) were pretreated with L659,066 (Merck, Sharp and Dhome Laboratories, Rahway, NJ), 1 and 10 mg/kg intraperitoneally 30 min before N<sub>2</sub>O exposure, or cohorts of mice (n = 6) were treated with intraperitoneal L659,066, 10 mg/kg 15 min before intraperitoneal dexmedetomidine 100  $\mu$ g/kg.

To determine the dependence of  $\alpha_{2A}$ - or  $\alpha_{2B}$ -adreno-



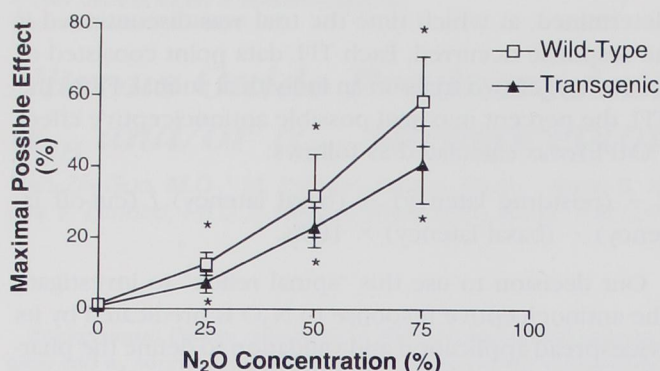

Fig 1. Dose-response relationship of N<sub>2</sub>O analgesic effect in wild-type and  $\alpha_{2A}$  transgenic mice. Different groups of mice ( $n = 8$  per group) were exposed for 30 min to N<sub>2</sub>O (25%, 50%, and 75%) or to air in an enclosed chamber. Tail-flick latency was then measured. Data are expressed as mean  $\pm$  SEM. \* = significantly different ( $P < 0.05$ ) from baseline measurement. When the two groups of mice are analyzed by two-way analysis of variance, the antinociceptive response curves are statistically significantly different.  $P < 0.0001$ .

ceptor subtypes, or both, cohorts of mice ( $n = 8$ ) were pretreated with prazosin (Sigma Chemical), 1, 5, and 10 mg/kg intraperitoneally 30 min before 70% N<sub>2</sub>O exposure, or cohorts of mice ( $n = 6$ ) were treated with prazosin, 10 mg/kg intraperitoneally 15 min before intraperitoneal dexmedetomidine, 100  $\mu$ g/kg.

At the doses used, the antagonists had no independent effect on TFL.

**Statistical Analysis.** In most cases, data were analyzed using a single-factor analysis of variance and ex-

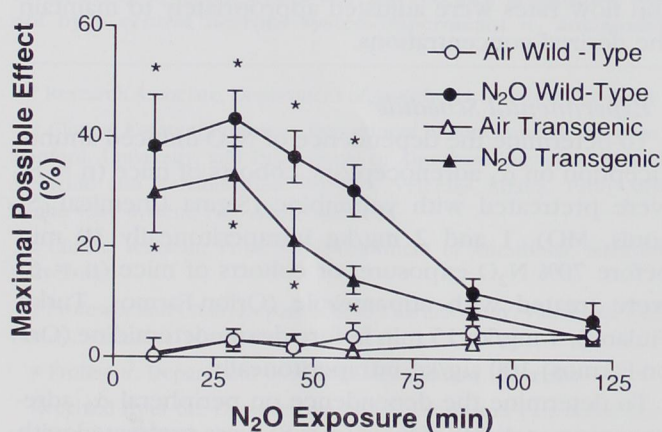

Fig 2. Time course of N<sub>2</sub>O analgesic effect in wild-type and  $\alpha_{2A}$  transgenic mice. Mice ( $n = 8$  per group) were exposed to 70% N<sub>2</sub>O or to air in an enclosed chamber. Tail-flick latency was measured at a scheduled time. Data are expressed as mean  $\pm$  SEM. \* = significantly different ( $P < 0.05$ ) from baseline measurement. When the two groups of mice are analyzed by two-way analysis of variance, the antinociceptive time-course curves are statistically significantly different.  $P < 0.01$ .

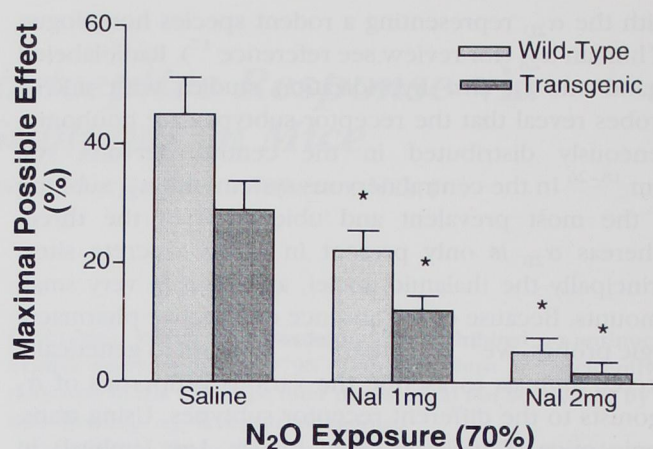

Fig 3. Effect of naloxone on analgesic response to N<sub>2</sub>O. Three groups of wild-type and  $\alpha_{2A}$  transgenic mice ( $n = 8$  per group) were administered saline and naloxone, 1.0 and 2 mg/kg intraperitoneally, then immediately exposed to 70% N<sub>2</sub>O. Tail-flick latency was measured before and 30 min after injection. Data are expressed as mean  $\pm$  SEM. \* = significantly different ( $P < 0.05$ ) from baseline measurement. Naloxone effect did not differ between wild-type and transgenic mice.

pressed as a mean  $\pm$  standard error of the mean. To assess whether the response curves for the effect of concentration and time of exposure were different, two-way analysis of variance was performed.

## Results

Exposure to N<sub>2</sub>O produced a dose-dependent antinociceptive response in both the wild-type and the transgenic mice (fig. 1). The time-course of antinociception during continuous exposure to 70% N<sub>2</sub>O (fig. 2) reveals a maximum response at 30 min, which gradually returned to baseline over the next 60 min. When individual concentrations and time points were compared, no significant difference was noted between transgenic and wild-type mice by single-factor analysis of variance. However when data from all concentrations were simultaneously analyzed by two-factor analysis of variance, the response of the transgenic animals was found to be less than observed in the wild type. In both types of mice, the antinociceptive response was blocked dose dependently by the opiate antagonist naloxone (fig. 3) and the nonselective  $\alpha_2$  antagonist yohimbine (fig. 4). However, the peripherally active  $\alpha_2$  antagonist L659,066 (fig. 5) was without effect in either the transgenic or the wild-type mice. Prazosin, the selective  $\alpha_{2B}$  and  $\alpha_{2C}$  antagonist, dose dependently blocked the antinociceptive effect in both the wild-type and the transgenic mice (fig. 6).



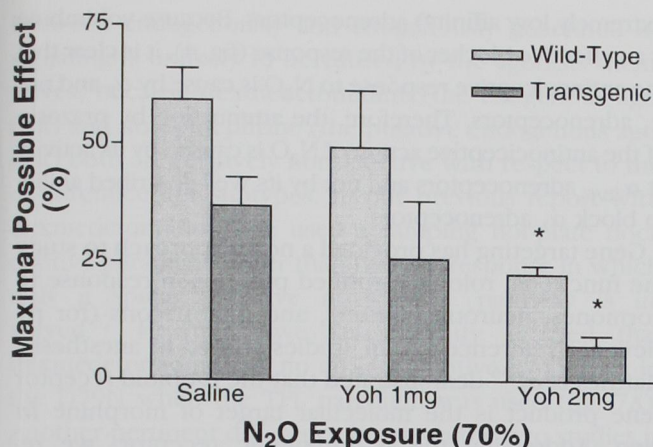

Fig 4. Effect of yohimbine on analgesic response to N<sub>2</sub>O. Three groups of wild-type and  $\alpha_{2A}$  transgenic mice ( $n = 8$  per group) were administered intraperitoneally by saline and yohimbine, 1.0 and 2 mg/kg, then immediately exposed to 70% N<sub>2</sub>O. Tail-flick latency was measured before and 30 min after injection. Data are expressed as mean  $\pm$  SEM. \* = significantly different ( $P < 0.05$ ) from baseline measurement. Yohimbine effect did not differ between wild-type and transgenic mice.

Dexmedetomidine, the potent nonselective  $\alpha_2$  agonist, exhibits a dose-dependent antinociceptive effect in wild-type animals (fig. 7A); unlike N<sub>2</sub>O (fig. 1), dexmedetomidine does not produce antinociception in transgenic animals (fig. 7A). The antinociceptive effect of dexmedetomidine in wild-type mice was not blocked by doses of prazosin (fig. 7B), which significantly attenuated the antinociceptive response to N<sub>2</sub>O (fig. 6). Similarly, the antinociceptive effect of dexmedetomidine in wild-type

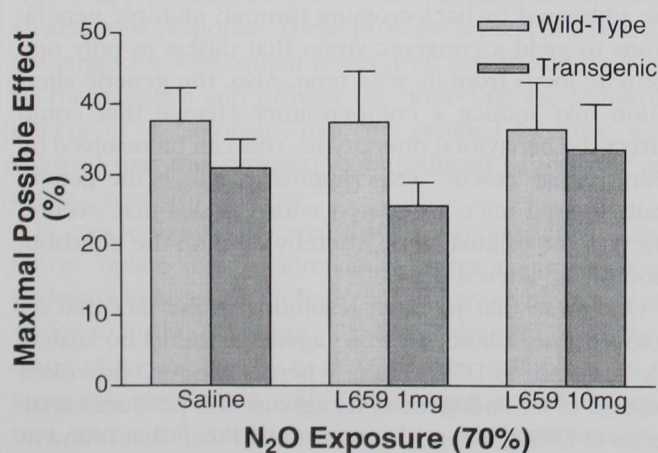

Fig 5. Effect of L659,066 on analgesic response to N<sub>2</sub>O. Three groups of wild-type and  $\alpha_{2A}$  transgenic mice ( $n = 8$  per group) were administered saline and L659,066, 1.0 and 10 mg/kg intraperitoneally, then immediately exposed to 70% N<sub>2</sub>O. Tail-flick latency was measured before and 30 min after injection. Data are expressed as mean  $\pm$  SEM.

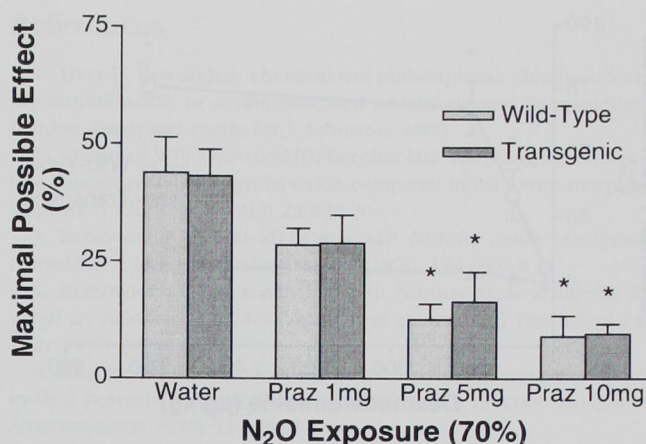

Fig 6. Effect of prazosin on analgesic response to N<sub>2</sub>O. Four groups of wild-type and  $\alpha_{2A}$  transgenic mice ( $n = 8$  per group) were administered distilled water and prazosin 1.0, 5.0, and 10 mg/kg intraperitoneally, then immediately exposed to 70% N<sub>2</sub>O. Tail-flick latency was measured before and 30 min after injection. Data are expressed as mean  $\pm$  SEM. \* = significantly different ( $P < 0.05$ ) from baseline measurement. Prazosin effect did not differ between wild-type and transgenic mice.

mice was not blocked by L659,066, the peripheral  $\alpha_2$  antagonist.

## Discussion

From these data we may deduce that, similar to the rat,<sup>32</sup> the antinociceptive response to N<sub>2</sub>O in mice is dependent on opiate and  $\alpha_2$ -adrenergic receptor pathways. In D79N mice, a genetically altered strain with dysfunctional  $\alpha_{2A}$  adrenoceptors, N<sub>2</sub>O can still exert a significant antinociceptive response. Because this antinociceptive response can be blocked by a nonselective  $\alpha_2$  antagonist, these data indicate that receptor subtypes other than  $\alpha_{2A}$  transduce the N<sub>2</sub>O effect. This is supported by the experiment in which prazosin ( $\alpha_{2B}$ - and  $\alpha_{2C}$ -subtype antagonist with extremely low affinity for the  $\alpha_{2A}$  subtype)<sup>33,34</sup> blocked the antinociceptive effect of N<sub>2</sub>O. Although dexmedetomidine and N<sub>2</sub>O both produce their antinociceptive responses *via*  $\alpha_2$  adrenoceptors (blocked by either yohimbine [fig. 4] or atipamezole [fig. 7B]), there are two major differences. Prazosin does not attenuate the antinociceptive response to dexmedetomidine (fig. 7B), whereas it dose dependently blocks the antinociceptive response to N<sub>2</sub>O (fig. 6). Secondly, dexmedetomidine is ineffective in D79N transgenic mice, whereas our current report shows that the response to N<sub>2</sub>O is still present in these mice.

Definition of the molecular components involved in a



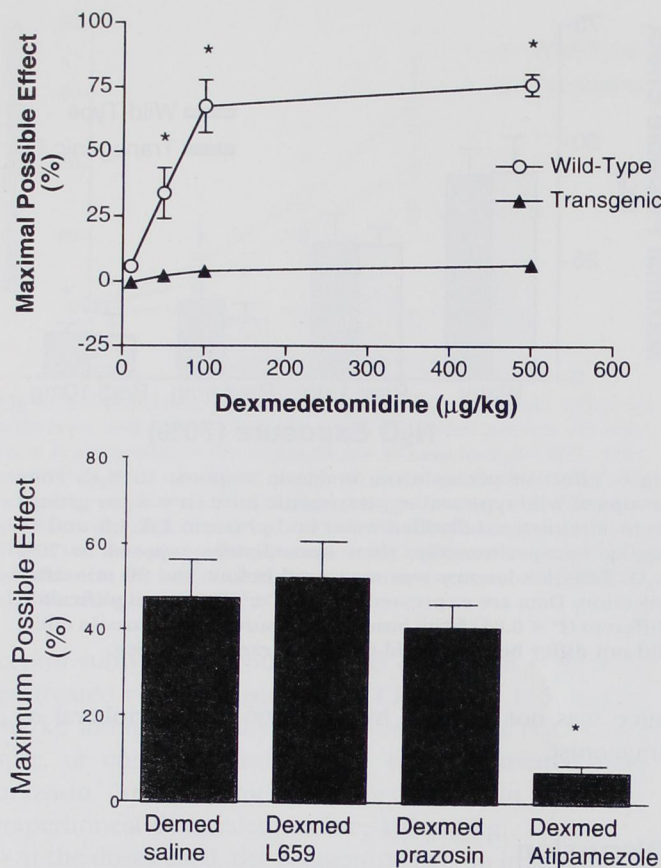

Fig 7. (A) The analgesic effect of dexmedetomidine in wild-type and  $\alpha_{2A}$  transgenic mice. A cumulative (intraperitoneal) dexmedetomidine dose-antinociceptive response was performed in the two species of mice ( $n = 9$  per group) using tail-flick latency response 30 min after dexmedetomidine injection. Data are expressed as mean  $\pm$  SEM. \* = significantly different ( $P < 0.05$ ) from baseline measurement. (B) The ability of various antagonists to block the analgesic effect of dexmedetomidine was tested in four cohorts of wild-type mice ( $n = 6$ ). Cohorts were pretreated 15 min before intraperitoneal dexmedetomidine (100  $\mu$ g/kg) with either intraperitoneal saline, (L659, 0.066 mg/kg), intraperitoneal prazosin, (10 mg/kg), or intraperitoneal atipamezole (1 mg/kg). Tail flick latency was measured before and 30 min after dexmedetomidine injection. Data are expressed as mean  $\pm$  SEM. \* = significantly different ( $P < 0.05$ ) from dexmedetomidine-alone measurement.

behavioral response to a drug has relied heavily on the use of pharmacologic probes. Unfortunately, in the field of  $\alpha_2$ -adrenoceptor pharmacology this has proven to be unhelpful because of the lack of subtype-selective ligands. The only compound that has proven to be at all useful is the prototype  $\alpha_1$  antagonist prazosin, which has between a 10- and 100-fold higher affinity for the  $\alpha_{2B}$  and  $\alpha_{2C}$  subtype than for the  $\alpha_{2A}$  subtype, respectively.<sup>33,34</sup> Yohimbine is used to distinguish pharmacologic actions at the  $\alpha_2$  adrenoceptor (which it blocks) from the  $\alpha_1$  (at which it has

extremely low affinity) adrenoceptors. Because yohimbine is an effective blocker of the response (fig. 4), it is clear that the antinociceptive response to  $N_2O$  is caused by  $\alpha_2$  and not  $\alpha_1$  adrenoceptors. Therefore, the attenuation by prazosin of the antinociceptive action of  $N_2O$  is caused by its activity at  $\alpha_{2B/C}$  adrenoceptors and not by its well-described ability to block  $\alpha_1$  adrenoceptors.

Gene targeting has provided a novel approach to study the functional role of identified proteins in response to hormones, neurotransmitters, and pharmacons (for review see reference<sup>35</sup>). In studies related to anesthesia, Matthes *et al.*<sup>36</sup> demonstrated that the  $\mu$ -opioid receptor gene product is the molecular target of morphine *in vivo*. Addressing the  $\alpha_2$ -adrenergic receptor, we reported that the entire repertoire of anesthetic and analgesic actions of dexmedetomidine, the  $\alpha_2$  agonist, was blocked in D79N mice.<sup>27</sup> The hypnotic response to barbiturates, the anesthetic-sparing action of adenosine, and the antinociceptive response to morphine were each unaltered in the D79N mice, demonstrating the specificity of the altered molecular component. Actions mediated by the  $\alpha_{2B}$ -receptor subtype, including hypertension,<sup>29</sup> remain unaffected in mice with the dysfunctional  $\alpha_{2A}$ -receptor subtype.<sup>28</sup> Therefore, D79N transgenic mice have a discrete and selective defect only in the signaling pathway involving the  $\alpha_{2A}$ -receptor subtype. Although the data from the studies cited are relatively unambiguous, there are caveats that need to be addressed. It is possible that other genetic loci in the strain of mice from which the embryonic stem cells were derived can account for some of the changes. This can be addressed by back-crossing through multiple generations to yield a congenic strain that differs in only one genetic locus from its wild type. Also, the genetic alteration may induce a compensatory change that could affect the behavioral phenotype. This can be resolved by performing "rescue" experiments in which the genetically altered mice are mated with a strain that overexpresses the original gene, thereby diluting the contribution of the altered gene.

One issue that requires resolution is the fact that an exogenously administered  $\alpha_2$  agonist exhibits no analgesic response in D79N mice, whereas the  $N_2O$ -provoked release of an endogenous  $\alpha_2$  agonist still produces analgesia in D79N, albeit less pronounced than that found in the litter mates. Thus,  $N_2O$  does not depend, exclusively, on the  $\alpha_{2A}$  adrenoceptor to transduce its antinociceptive response, as is the case for the exogenously administered  $\alpha_2$  agonist (fig. 7A); rather,  $N_2O$  can use non- $\alpha_{2A}$ -adrenoceptor subtypes. The reason for this difference



N<sub>2</sub>O ANTINOCICEPTION VIA  $\alpha_{2B}$  AND/OR  $\alpha_{2C}$  ADRENOCEPTORS

between endogenously and exogenously generated  $\alpha_2$  signaling is unlikely to be caused by the agonists themselves, because dexmedetomidine (the exogenous agonist) and norepinephrine (the putative endogenous agonist) both are relatively nonselective with respect to the  $\alpha_2$ -adrenoceptor subtypes. In our previous report with dexmedetomidine, we used a ramping hot-plate nociceptive paradigm rather than the TFL response in which only a spinal reflexive nociceptive pathway is involved.<sup>37</sup> However, we subsequently showed that dexmedetomidine has no antinociceptive properties in the D79N when the TFL paradigm was used (fig. 7A). Another pertinent difference between the two studies is the fact that dexmedetomidine was administered systemically whereas, during N<sub>2</sub>O exposure, norepinephrine was presumably released at the terminals of the descending noradrenergic pathway in the dorsal horn of the spinal cord. However, it has been shown recently that even intrathecally administered dexmedetomidine is ineffective in the tail-flick test in D79N mice.<sup>38</sup> The current findings are consistent with our previous observation that systemic morphine is as effective in the D79N as in the wild-type mice, because previous studies showed that morphine works, in part, through the supraspinal activation in the periaqueductal gray of a descending noradrenergic pathway, which is presumably similar to the action of N<sub>2</sub>O.

The results from our study have potentially far-reaching consequences because they illustrate that the  $\alpha_{2B}$ - or  $\alpha_{2C}$ -receptor subtypes, or both, are capable of mediating an analgesic response. These proteins represent a potential target for subsequent novel drug design and synthesis for analgesia and provide the hope that the sedative effects of  $\alpha_2$  agonists may be avoided because we showed that this property is transduced exclusively at the  $\alpha_{2A}$ -receptor subtype.<sup>27,39</sup>

In conclusion, we showed that N<sub>2</sub>O antinociception involves opiate and  $\alpha_2$ -adrenergic receptor transduction pathways in mice, which represent an important species in which to further investigate the molecular mechanism because of its accessibility to gene transfer technology. In a transgenic mice strain with dysfunctional  $\alpha_{2A}$  adrenoceptors, we are still able to demonstrate a significant antinociceptive response to N<sub>2</sub>O, indicating that  $\alpha_{2B}$  and  $\alpha_{2C}$  subtypes also participate in this response. Studies are ongoing to develop mice lacking  $\alpha_{2B}$  or  $\alpha_{2C}$  subtypes, or both, to determine whether their involvement is sufficient to produce the antinociceptive response to N<sub>2</sub>O.

## References

1. Davy H: Researches, chemical and philosophical; chiefly concerning nitrous oxide, or dephlogisticated nitrous air, and its respiration. London, Biggs and Cottle for J. Johnston, 1800
2. Chapman WP, Arrowood JG, Beecher HK: The analgetic effects of low concentrations of nitrous oxide compared in man with morphine sulphate. *J Clin Invest* 1943; 22:871-5
3. Berkowitz BA, Ngai SH, Finck AD: Nitrous oxide "analgesia": resemblance to opiate action. *Science* 1976; 194:967-8
4. Berkowitz BA, Finck AD, Ngai SH: Nitrous oxide analgesia: Reversal by naloxone and development of tolerance. *J Pharmacol Exp Ther* 1977; 203:539-47
5. Chapman CR, Benedetti C: Nitrous oxide effects on cerebral evoked potential to pain: Partial reversal with a narcotic antagonist. *ANESTHESIOLOGY* 1979; 51:135-8
6. Lawrence D, Livingston A: Opiate-like analgesic activity in general anaesthetics. *Br J Pharmacol* 1981; 73:435-42
7. Yang JC, Clark WC, Ngai SH: Antagonism of nitrous oxide analgesia by naloxone in man. *ANESTHESIOLOGY* 1980; 52:414-7
8. Berkowitz BA, Finck AD, Hynes MD, Ngai SH: Tolerance to nitrous oxide analgesia in rats and mice. *ANESTHESIOLOGY* 1979; 51:309-12
9. Quock RM, Kouchich FJ, Tseng LF: Does nitrous oxide induce release of brain opioid peptides? *Pharmacology* 1985; 30:95-9
10. Zuniga JR, Joseph SA, Knigge KM: The effects of nitrous oxide on the central endogenous pro-opiomelanocortin system in the rat. *Brain Res* 1987; 420:57-65
11. Zuniga JR, Joseph SA, Knigge KM: The effects of nitrous oxide on the secretory activity of pro-opiomelanocortin peptides from basal hypothalamic cells attached to cytodex beads in a superfusion in vitro system. *Brain Res* 1987; 420:66-72
12. Finck AD, Samaniego E, Ngai SH: Nitrous oxide selectively releases Met<sup>5</sup>-enkephalin and Met<sup>5</sup>-enkephalin-Arg<sup>6</sup>-Phe<sup>7</sup> into canine third ventricular cerebrospinal fluid. *Anesth Analg* 1995; 80:664-70
13. Yeung JC, Yaksh TL, Rudy TA: Concurrent mapping of brain sites for sensitivity to the direct application of morphine and focal electrical stimulation in the production of antinociception in the rat. *Pain* 1977; 4:23-40
14. Fang F, Guo TZ, Davies MF, Maze M: Opiate receptors in the periaqueductal gray mediate analgesic effect of nitrous oxide in rats. *Eur J Pharmacol* 1997; 336:137-41
15. Hodges BL, Gagnon MJ, Gillespie TR, Brencisen JR, O'Leary DF, Hara S, Quock RM: Antagonism of nitrous oxide antinociception in the rat hot plate test by site-specific mu and epsilon opioid receptor blockade. *J Pharmacol Exp Ther* 1994; 269:596-600
16. Camarata PJ, Yaksh TL: Characterization of the spinal adrenergic receptors mediating the spinal effects produced by the microinjection of morphine into the periaqueductal gray. *Brain Res* 1985; 336:133-42
17. Bylund DB: Subtypes of alpha 1- and alpha 2-adrenergic receptors. *Faseb J* 1992; 6: 832-9
18. Ordway GA, Jaconetta SM, Halaris AE: Characterization of subtypes of alpha-2 adrenoceptors in the human brain. *J Pharmacol Exp Ther* 1993; 264:967-76
19. Wamsley JK, Alburges ME, Hunt MA, Bylund DB: Differential localization of alpha 2-adrenergic receptor subtypes in brain. *Pharmacol Biochem Behav* 1992; 41:267-73
20. Lawhead RG, Blaxall HS, Bylund DB: Alpha-2A is the predominant alpha-2 adrenergic receptor subtype in human spinal cord. *ANESTHESIOLOGY* 1992; 77:983-91
21. De Vos H, Bricca G, De Keyser J, De Backer JP, Bousquet P,



- Vauquelin G: Imidazoline receptors, non-adrenergic idazoxan binding sites and alpha 2-adrenoceptors in the human central nervous system. *Neuroscience* 1994; 59:589-98
22. Handy DE, Flordellis CS, Bogdanova NN, Bresnahan MR, Gavras H: Diverse tissue expression of rat alpha 2-adrenergic receptor genes. *Hypertension* 1993; 21:861-5
23. Uhlen S, Wikberg JE: Rat spinal cord alpha 2-adrenoceptors are of the alpha 2A-subtype: Comparison with alpha 2A- and alpha 2B-adrenoceptors in rat spleen, cerebral cortex and kidney using <sup>3</sup>H-RX821002 ligand binding. *Pharmacol Toxicol* 1991; 69:341-50
24. Zeng D, Lynch KR: Distribution of alpha2-adrenergic receptor mRNAs in the rat CNS. *Mol Brain Res* 1991; 10:219-25
25. Scheinin M, Lomasney JW, Hayden-Hixson DM: Distribution of alpha 2 adrenergic receptor subtype gene expression in rat brain. *Mol Brain Res* 1994; 21:133-49
26. Nicholas AP, Pieribone V, Hokfelt T: Distributions of mRNAs for alpha-2 adrenergic receptor subtypes in rat brain: An in situ hybridization study. *J Comp Neurol* 1993; 328:575-94
27. Lakhani PP, MacMillan LB, Guo TZ, McCool BA, Lovinger DM, Maze M, Limbird LE: Substitution of a mutant alpha2a-adrenergic receptor via "hit and run" gene targeting reveals the role of this subtype in sedative, analgesic, and anesthetic-sparing responses in vivo. *Proc Natl Acad Sci U S A* 1997; 94:9950-5
28. MacMillan LB, Hein L, Smith MS, Piascik MT, Limbird LE: Central hypotensive effects of the alpha2a-adrenergic receptor subtype. *Science* 1996; 273:801-3
29. Link RE, Desai K, Hein L, Stevens ME, Chruscinski A, Bernstein D, Barsh GS, Kobilka BK: Cardiovascular regulation in mice lacking alpha 2-adrenergic receptor subtypes B and C. *Science* 1996; 273:803-5
30. Surprenant A, Horstman DA, Akbarali H, Limbird LE: A point mutation of the alpha 2-adrenoceptor that blocks coupling to potassium but not calcium currents. *Science* 1992; 257:977-80
31. Hammond D: Inferences of pain and its modulation from simple behaviors. *Adv Pain Res Ther* 1989; 12:69-92
32. Guo TZ, Poree L, Golden W, Stein J, Fujinaga M, Maze M: Antinociceptive response to nitrous oxide is mediated by supraspinal opiate and spinal alpha 2 adrenergic receptors in the rat. *ANESTHESIOLOGY* 1996; 85:846-52
33. Hieble JP, Ruffolo RR: Subclassification and nomenclature of alpha 1- and alpha 2-adrenoceptors. *Prog Drug Res* 1996; 47:81-130
34. Bylund DB, Eikenberg DC, Hieble JP, Langer SZ, Lefkowitz RJ, Minneman KP, Molinoff PB, Ruffolo RR, Trendelenburg U: International union of pharmacology nomenclature of adrenoceptors. *Pharmacol Rev* 1994; 46:121-35
35. Koller BH, Smithies O: Altering genes in animals by gene targeting. *Ann Rev Immunol* 1992; 10:705-30
36. Matthes HW, Maldonado R, Simonin F, Valverde O, Slowe S, Kitchen I, Befort K, Dierich A, Le Meur M, Dolle P, Tzavara E, Hanoune J, Roques BP, Kieffer BL: Loss of morphine-induced analgesia, reward effect and withdrawal symptoms in mice lacking the mu-opioid-receptor gene. *Nature* 1996; 383:819-23
37. Chapman CR, Casey KL, Dubner R, Foley KM, Gracely RH, Reading AE: Pain measurement: An overview. *Pain* 1985; 22:1-31
38. Stone LS, MacMillan LB, Kitto KF, Limbird LE, Wilcox GL: The alpha2a adrenergic receptor subtype mediates spinal analgesia evoked by alpha2 agonists and is necessary for spinal adrenergic-opioid synergy. *J Neurosci* 1997; 17:7157-65
39. Mizobe T, Maghsoudi K, Sitwala K, Tianzhi G, Ou J, Maze M: Antisense technology reveals the alpha2A adrenoceptor to be the subtype mediating the hypnotic response to the highly selective agonist, dexmedetomidine, in the locus coeruleus of the rat. *J Clin Invest* 1996; 98:1076-80 (Jackson Labs, Bar Harbor, ME)
